# Supplementary material for: Association between sports expertise and visual attention in male and female soccer players
Source: PeerJ. 2023 Oct 19;11:e16286. doi: 10.7717/peerj.16286 (PMC10590570; doi:10.7717/peerj.16286)
Supplement: Supplemental Information 1 — The calculated tracking accuracy by determining the proportion of correctly picked targets across all 40 trials for each participant. As an example, if a participant identified all four targets 18 of 40 times, the tracking accuracy was 0.45. [file peerj-11-16286-s001.xlsx]

## Sheet: Sheet1
	Gender	Groups	Tracking Accuracy
1	male	expert	0.48
2	male	expert	0.58
3	male	expert	0.68
4	male	expert	0.43
5	male	expert	0.53
6	male	expert	0.63
7	male	expert	0.43
8	male	expert	0.63
9	male	expert	0.43
10	male	expert	0.6
11	male	expert	0.38
12	male	expert	0.43
13	male	expert	0.55
14	male	expert	0.48
15	male	expert	0.4
16	male	expert	0.45
17	male	expert	0.55
18	male	expert	0.48
19	male	expert	0.45
20	male	expert	0.53
21	male	expert	0.58
22	male	expert	0.43
23	male	expert	0.53
24	male	expert	0.3
25	male	expert	0.53
26	male	expert	0.45
27	male	expert	0.5
28	male	expert	0.63
29	male	expert	0.65
30	male	expert	0.58
31	male	expert	0.53
32	male	expert	0.43
1	female	expert	0.43
2	female	expert	0.48
3	female	expert	0.65
4	female	expert	0.45
5	female	expert	0.48
6	female	expert	0.5
7	female	expert	0.56
8	female	expert	0.6
9	female	expert	0.65
10	female	expert	0.48
11	female	expert	0.35
12	female	expert	0.5
13	female	expert	0.55
14	female	expert	0.53
15	female	expert	0.5
16	female	expert	0.6
17	female	expert	0.7
18	female	expert	0.38
19	female	expert	0.43
20	female	expert	0.4
21	female	expert	0.35
22	female	expert	0.33
23	female	expert	0.65
24	female	expert	0.43
25	female	expert	0.6
26	female	expert	0.38
27	female	expert	0.43
28	female	expert	0.45
29	female	expert	0.48
30	female	expert	0.3
31	female	expert	0.35
32	female	expert	0.55
1	male	novice	0.28
2	male	novice	0.35
3	male	novice	0.33
4	male	novice	0.38
5	male	novice	0.43
6	male	novice	0.33
7	male	novice	0.5
8	male	novice	0.53
9	male	novice	0.4
10	male	novice	0.28
11	male	novice	0.43
12	male	novice	0.33
13	male	novice	0.58
14	male	novice	0.38
15	male	novice	0.63
16	male	novice	0.48
17	male	novice	0.55
18	male	novice	0.28
19	male	novice	0.43
20	male	novice	0.23
21	male	novice	0.55
22	male	novice	0.4
23	male	novice	0.38
24	male	novice	0.23
25	male	novice	0.38
26	male	novice	0.25
27	male	novice	0.48
28	male	novice	0.2
29	male	novice	0.25
30	male	novice	0.2
31	male	novice	0.5
32	male	novice	0.45
1	female	novice	0.23
2	female	novice	0.25
3	female	novice	0.28
4	female	novice	0.23
5	female	novice	0.3
6	female	novice	0.18
7	female	novice	0.33
8	female	novice	0.2
9	female	novice	0.33
10	female	novice	0.35
11	female	novice	0.3
12	female	novice	0.18
13	female	novice	0.15
14	female	novice	0.28
15	female	novice	0.15
16	female	novice	0.2
17	female	novice	0.3
18	female	novice	0.18
19	female	novice	0.2
20	female	novice	0.38
21	female	novice	0.18
22	female	novice	0.25
23	female	novice	0.35
24	female	novice	0.28
25	female	novice	0.28
26	female	novice	0.43
27	female	novice	0.33
28	female	novice	0.28
29	female	novice	0.33
30	female	novice	0.43
31	female	novice	0.18
32	female	novice	0.38
